# Supplementary material for: Effects of mulching and flooding on soil nutrients and bacterial community structure under Phyllostachys praecox
Source: Frontiers journal article supplement (doi:10.3389/ffgc.2024.1411297), 2024-07-17
Supplement: Table_1.DOCX [file Table_1.DOCX]

Table S1 Primers used for PCR amplification for real-time quantification Application

| Target gene and primer | 5′-3′ | Reference |
| --- | --- | --- |
| AOA-F | STAATGGTCTGGCTTAGACG | Francis et al. 2005 |
| AOA-R | GCGGCCATCCATCTGTATGT |
| AOB-1F | GGGGTTTCTACTGGTGGT | Cytryn et al. 2012 |
| AOB-2R | CCCCTCKGSAAAGCCTTCTTC |
| Archaeal-519F | CAGCMGCCGCGGTAA | Park et al. 2010 |
| Archaeal-727R | GCTTTCRTCCCTCACCGT |
| Bacterial-518F | CCAGCAGCCGCGGTAAT | Jung et al. 2011 |
| Bacterial-786R | CTACCAGGGTATCTAATC |

Baker, G. C., J. J. Smith, and D. A. Cowan. 2003. Review and re-analysis of domain-specific 16S primers. J. Microbiol. Methods 55:541–555.

Francis CA, Roberts KJ, Beman JM, Santoro AE, Oakley BB (2005) Ubiquity and diversity of ammonia-oxidizing archaea in water columns and sediments of the ocean. Pro Natl Acad Sci USA 102:14683–14688

Cytryn E, Levkovitch I, Negreanu Y, Dowd S, Frenk S, Silber A (2012) Impact of short-term acidification on nitrification and nitrifying bacterial com- munity dynamics in soilless cultivation media. Appl Environ Microb 78:6576–6582

Jung M Y, Park S J, Min D, et al. Enrichment and characterization of an autotrophic ammonia-oxidizing archaeon of mesophilic crenarchaeal group I. 1a from an agricultural soil[J]. Applied and Environmental Microbiology, 2011, 77(24): 8635-8647.

Park, B. J., et al. 2010. Cultivation of autotrophic ammonia-oxidizing ar- chaea from marine sediments in co-culture with sulfur-oxidizing bacteria. Appl. Environ. Microbiol. 76:7575–7587.

Table S2 Real-time Quantitative PCR reaction solution

| Reagents | Amount | Final concentration |
| --- | --- | --- |
| TB Green Premix Ex Taq II（Tli RNaseH Plus）（2X） | 10 μl | 1X |
| Forward Primer（10 μM） | 0.8 μl | 0.4 μM*1 |
| Reverse Primer（10 μM） | 0.8 μl | 0.4 μM*1 |
| ROX Reference Dye（50X） | 0.4 μl | 1X |
| DNA template *3 | 2 μl |  |
| Sterile water | 6 μl |  |
| Total | 20 μl |  |

Table S3 Procedures of soil microbe analyze in real-time PCR

| Target microbes | PCR procedure |
| --- | --- |
| AOA | An initial cycle of 30 sec at 95 ℃; 40 cycles of 10sec at 95℃, 30 sec at 55 ℃, and 30 sec at 72 ℃; 15 sec at 95 ℃, 60 sec at 60 ℃, and 15 sec at 95 ℃ for melt curve. |
| AOB | An initial cycle of 30 sec at 95 ℃; 40 cycles of 10sec at 95℃, 30 sec at 55 ℃, and 30 sec at 72 ℃; 15 sec at 95 ℃, 60 sec at 60 ℃, and 15 sec at 95 ℃ for melt curve. |
| Archaeal | An initial cycle of 30 sec at 95 ℃; 40 cycles of 10sec at 95℃, 30 sec at 55 ℃, and 30 sec at 72 ℃; 15 sec at 95 ℃, 60 sec at 60 ℃, and 15 sec at 95 ℃ for melt curve. |
| Bacterial | An initial cycle of 30 sec at 95 ℃; 40 cycles of 10sec at 95℃, 30 sec at 55 ℃, and 30 sec at 72 ℃; 15 sec at 95 ℃, 60 sec at 60 ℃, and 15 sec at 95 ℃ for melt curve. |

Table S4 The specific percentage of dominant phylum in the bacterial community for each treatment

| Treatment (%) | Control | Mulched | Flooded |
| --- | --- | --- | --- |
| Proteobacteria | 26.20 | 27.60 | 34.78 |
| Actinobacteriota | 18.96 | 18.63 | 17.88 |
| Acidobacteriota | 23.02 | 17.67 | 7.38 |
| Chloroflexi | 11.79 | 16.69 | 8.85 |
| Firmicutes | 3.92 | 5.87 | 17.28 |
| Bacteroidota | 3.45 | 2.14 | 2.21 |
| Myxococcota | 2.84 | 2.18 | 1.12 |

Table S5 The specific percentage of dominant class in the bacterial community for each treatment

| Treatment (%) | Control | Mulched | Flooded |
| --- | --- | --- | --- |
| Ammoniphilus | 0.02 | 0.05 | 14.57 |
| Acidothermus | 3.35 | 3.54 | 3.22 |
| Vicinamibacterales | 4.36 | 4.19 | 0.08 |
| AD3 | 0.04 | 3.91 | 2.93 |
| JG30-KF-AS9 | 2.57 | 3.43 | 1.24 |
| Subgroup_2 | 2.24 | 3.00 | 0.29 |
| Bradyrhizobium | 2.77 | 2.02 | 1.52 |
